# Supplementary material
Source: ML conference proceedings conference paper supplement (https://openaccess.thecvf.com/content/WACV2022/html/Tanjim_Generating_and_Controlling_WACV_2022_paper.html)
Supplement: Supplementary file 1 [file Tanjim_Generating_and_Controlling_WACV_2022_supplemental.pdf]

# Generating and Controlling Diversity in Image Search

## - Supplementary Material -

Md Mehrab Tanjim\*  
UC San Diego

mtanjim@eng.ucsd.edu

Ritwik Sinha  
Adobe Research

risinha@adobe.com

Krishna Kumar Singh  
Adobe Research

krishsin@adobe.com

Sridhar Mahadevan  
Adobe Research

smahadev@adobe.com

David Arbour  
Adobe Research  
arbour@adobe.com

Moumita Sinha  
Adobe Applied ML  
mousinha@adobe.com

Garrison W. Cottrell  
UC San Diego  
gary@eng.ucsd.edu

### 1. Human Studies

We show one illustrative example from each of our human study types in the next page. Specifically, we show an example task from our Attribute Match Study in Figure 1, an example from our Preference Study in Figure 2, and an example from our Diversity Study in Figure 3.

### 2. Additional Generated Images

We also show one generated image from our strongest model Uniform+ for each combination of races (namely, White, Black and Asian) and genders (namely, Male and Female) for each of the 14 professions in the following pages (Figure 4 - 17). These images show the potential of Uniform+ to combat the bias in image search. For generating pictures, we used the truncation trick, where the center of mass in the latent codes  $\mathbf{w}$  is first calculated, and then samples are chosen randomly within a deviation  $\psi$  (called the truncation value) from this center. Mathematically:  $\mathbf{w}' = \bar{\mathbf{w}} + \psi(\mathbf{w} - \bar{\mathbf{w}})$ , where  $\bar{\mathbf{w}}$  is the center and the  $\mathbf{w}$ 's are the latent codes. We observed good results when we set  $\psi = 0.7$ .

---

\*Work done during an internship at Adobe Research

Instructions
Shortcuts
Which following attribute or attributes does this picture contain- Gender:Male, Race:Asian, Job:Nurse?

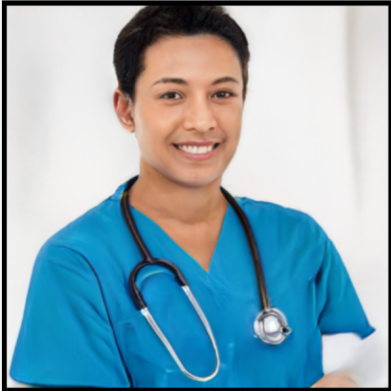

Select an option

|                      |   |
|----------------------|---|
| Gender Only          | 1 |
| Race Only            | 2 |
| Job Only             | 3 |
| Both Gender and Race | 4 |
| Both Gender and Job  | 5 |
| Both Race and Job    | 6 |
| All three            | 7 |
| None of them         | 8 |

Figure 1. An example task from our Attribute Match Study. Here, the image is generated from Uniform+.

Instructions
Shortcuts
Which of the following picture best fits the description 'Female Asian Plumber'?

First

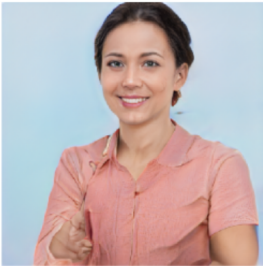

Second

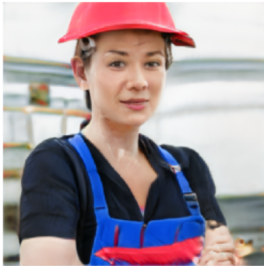

Third

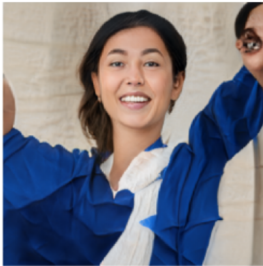

Select an option

|        |   |
|--------|---|
| First  | 1 |
| Second | 2 |
| Third  | 3 |

Figure 2. An example task from our Preference Study. Here, the models are as follows- First:Uniform, Second:Uniform+, Third:ADA.

Instructions
Shortcuts
Which of the following model generates more 'DIVERSE' images for the query 'Male White Machine Operator'?

First

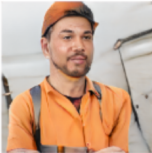
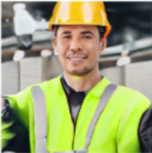
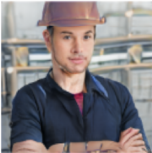
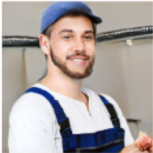
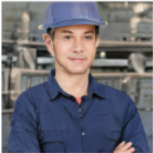

Second

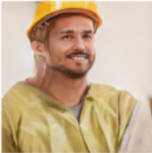
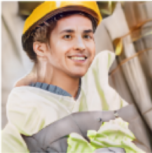
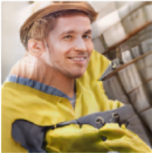
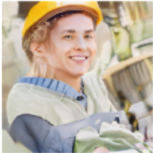
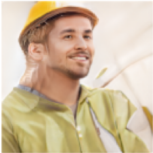

Select an option

|        |   |
|--------|---|
| First  | 1 |
| Second | 2 |

Figure 3. An example task from our Diversity Study. Here, the models are as follows- First:Uniform+, Second:Uniform.

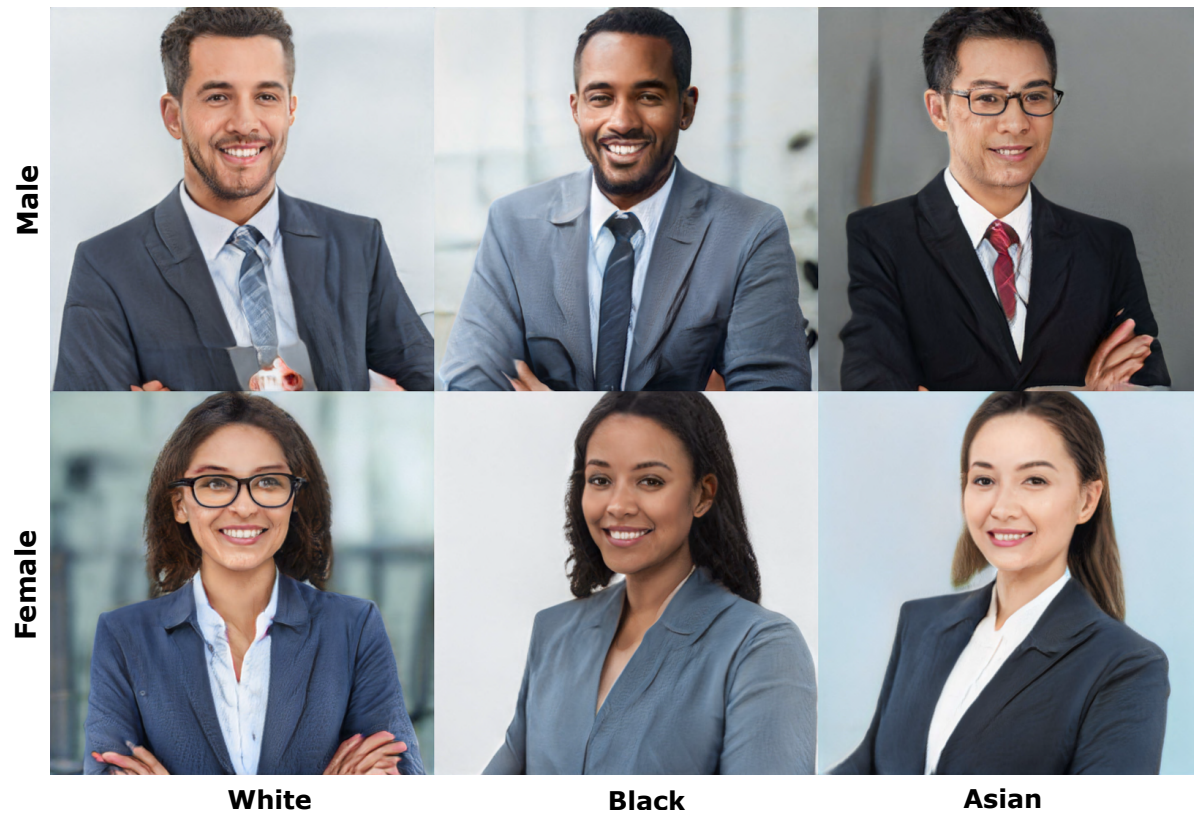

Figure 4. Executive Manager

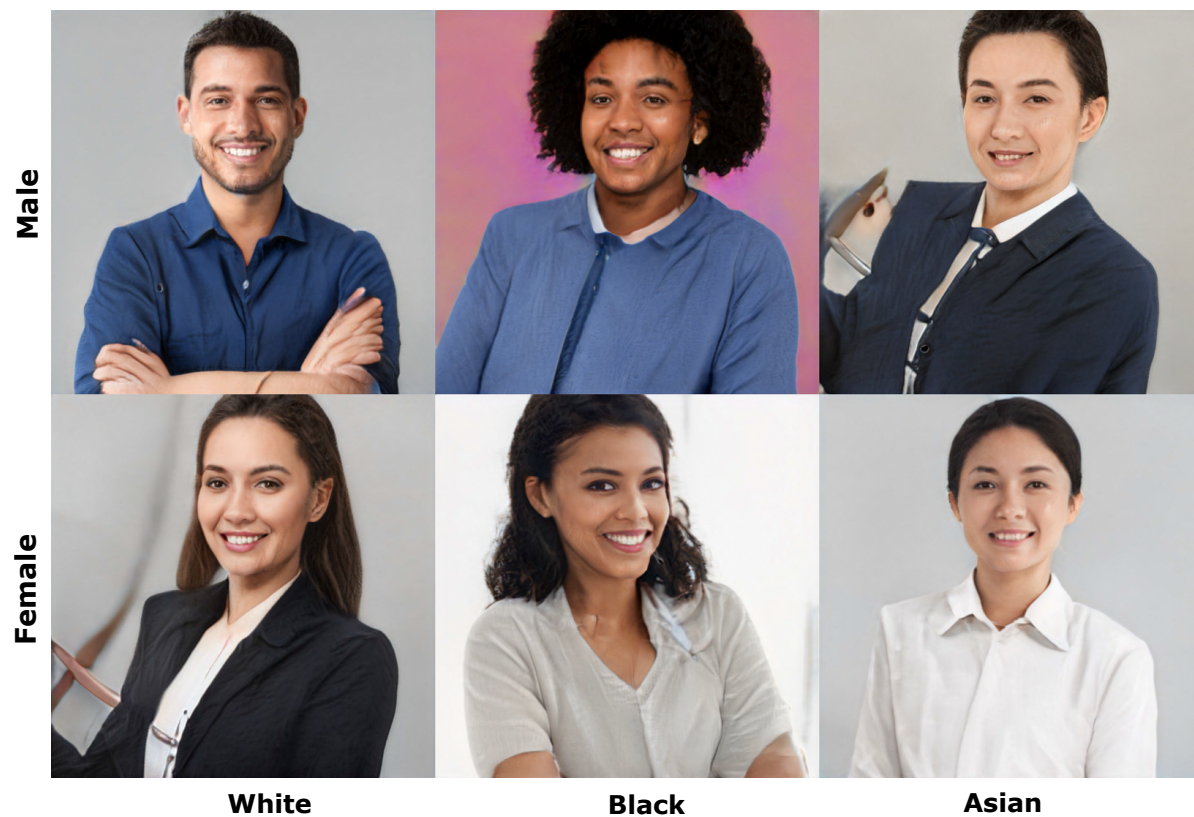

Figure 5. Administrative Assistant

**Male**

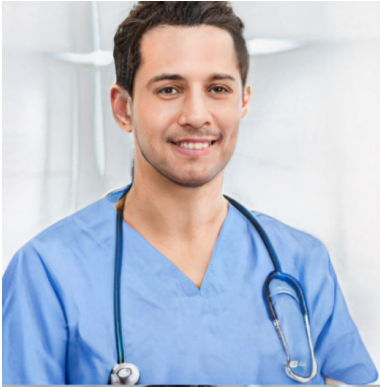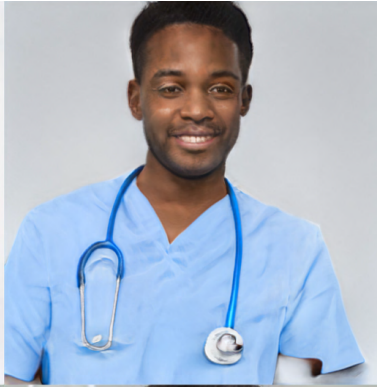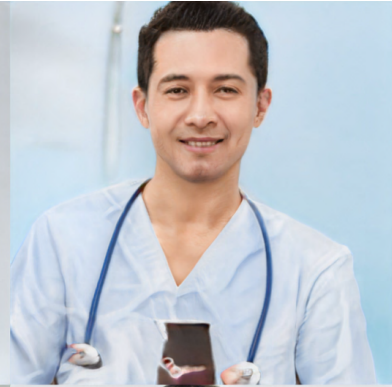

**Female**

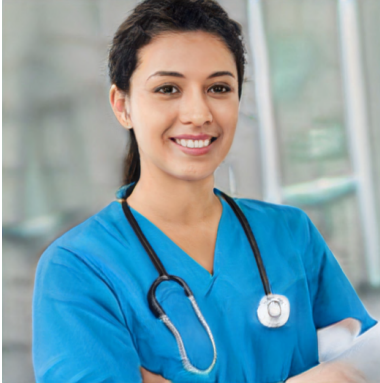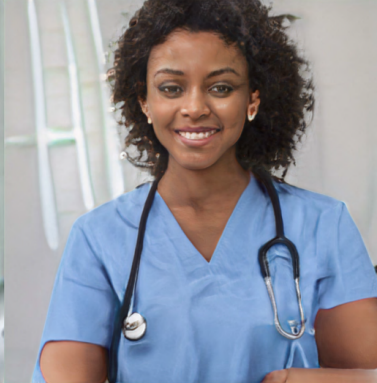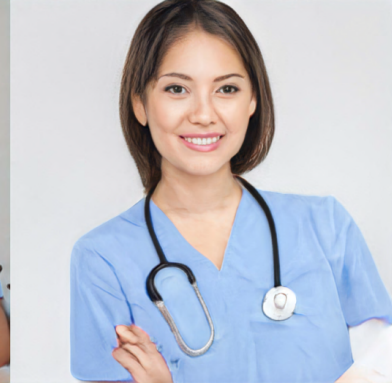

**White**

**Black**

**Asian**

Figure 6. Nurse

**Male**

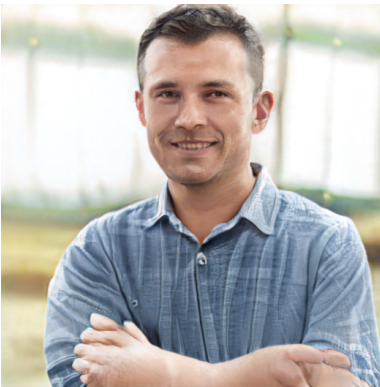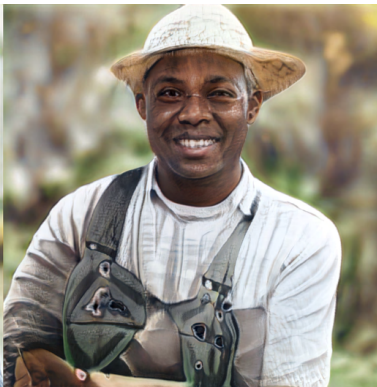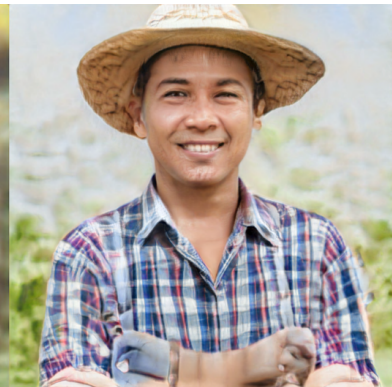

**Female**

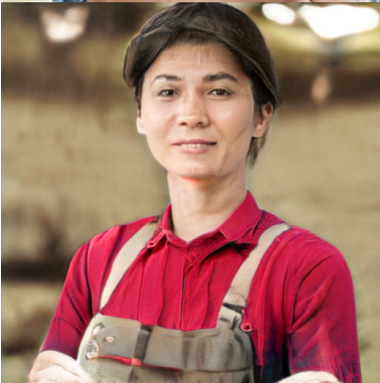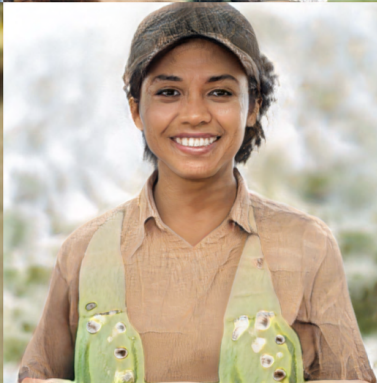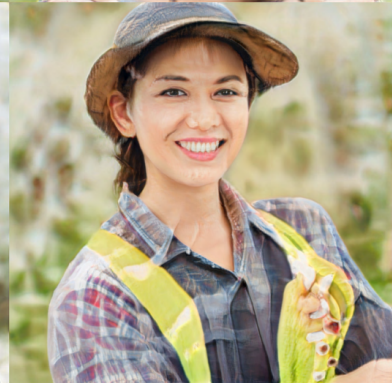

**White**

**Black**

**Asian**

Figure 7. Farmer

**Male**

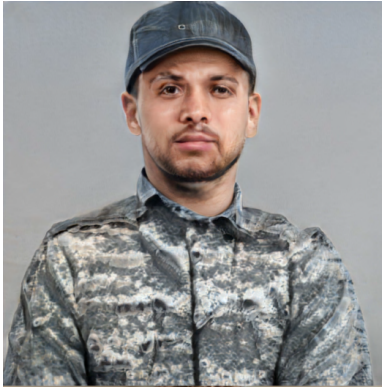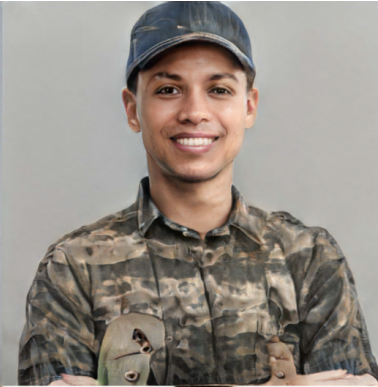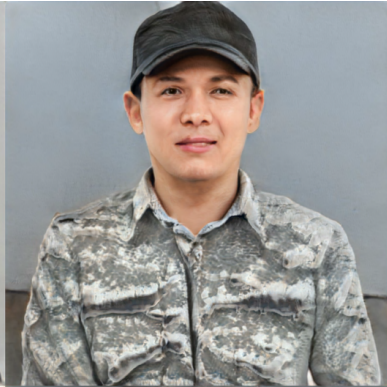

**Female**

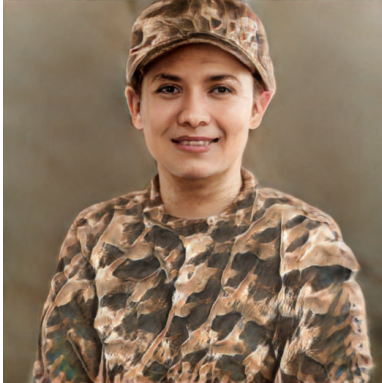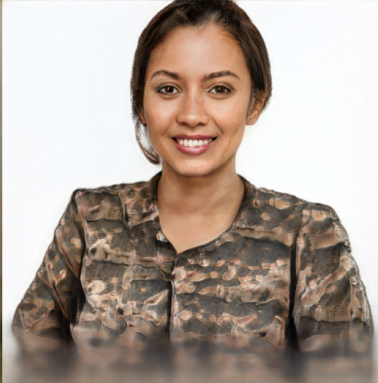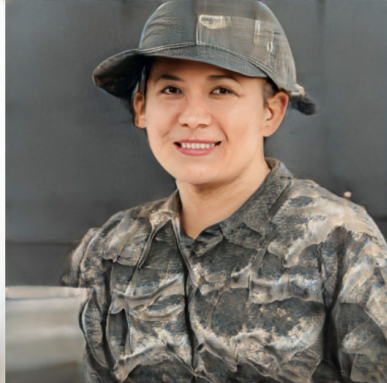

**White**

**Black**

**Asian**

Figure 8. Military Person

**Male**

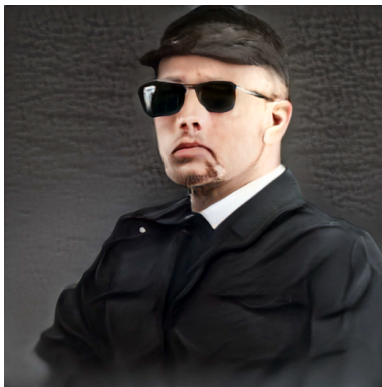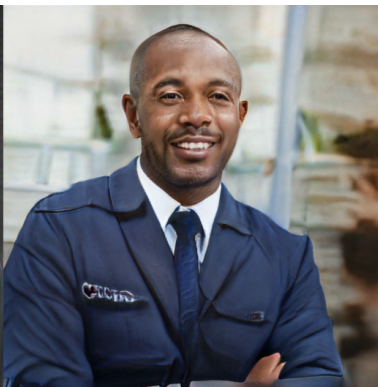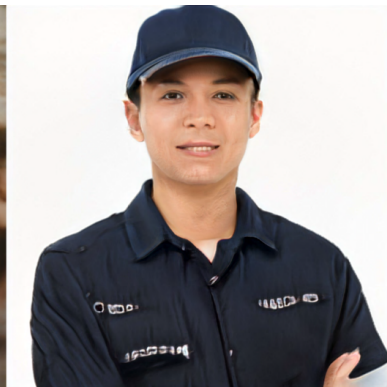

**Female**

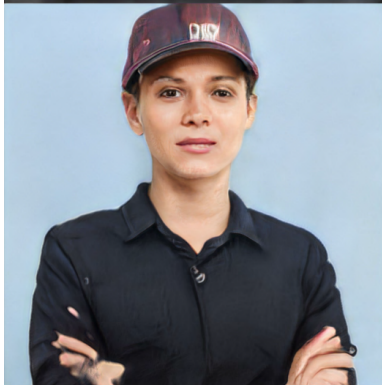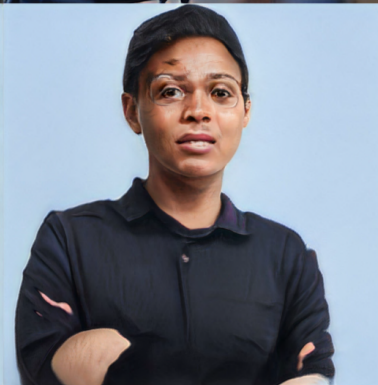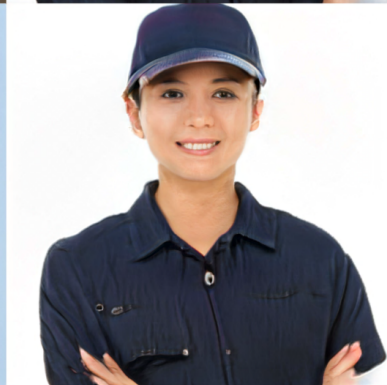

**White**

**Black**

**Asian**

Figure 9. Security Guard

**Male**

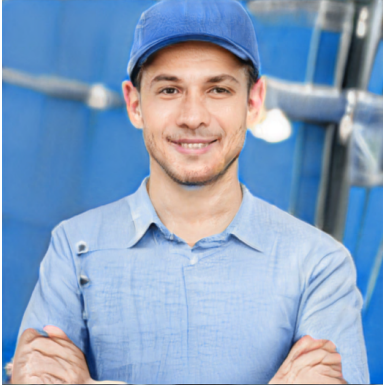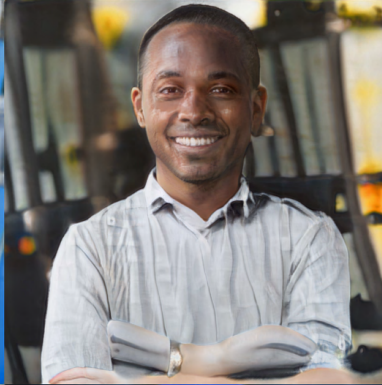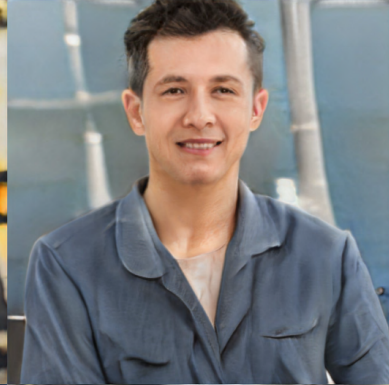

**Female**

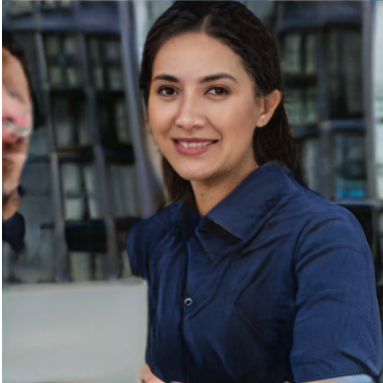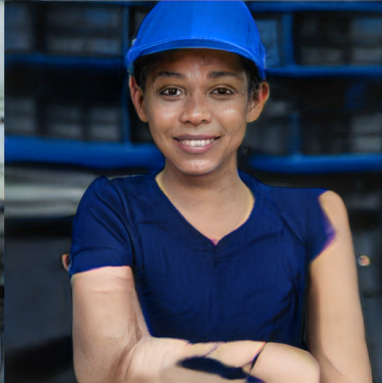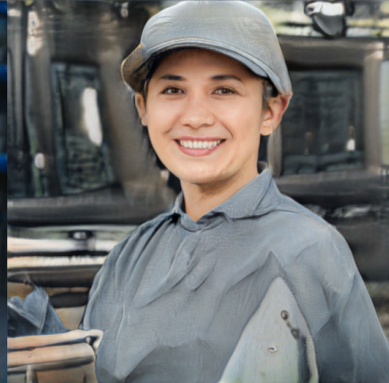

**White**

**Black**

**Asian**

Figure 10. Truck Driver

**Male**

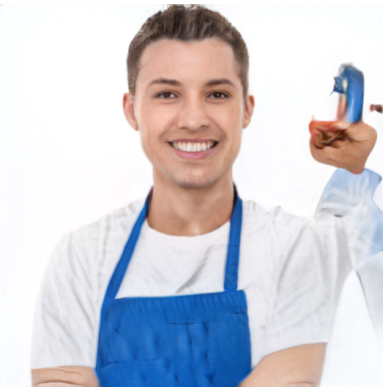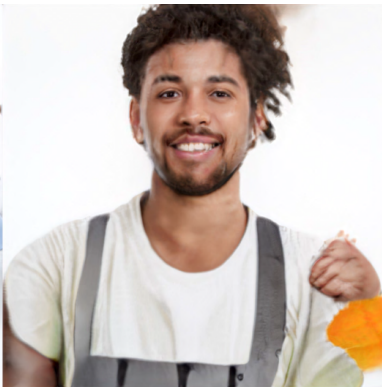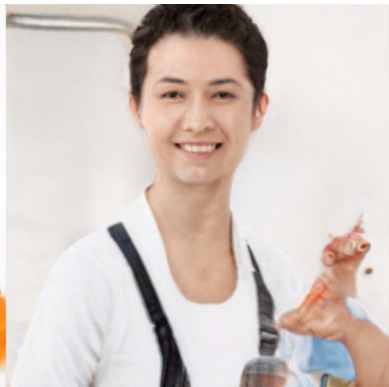

**Female**

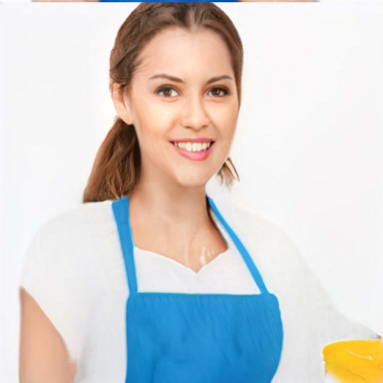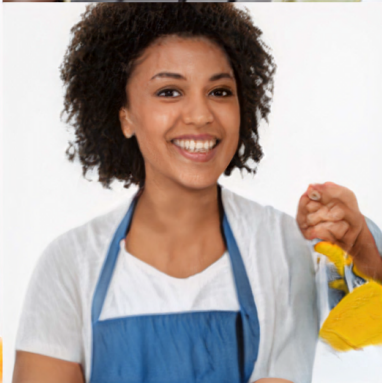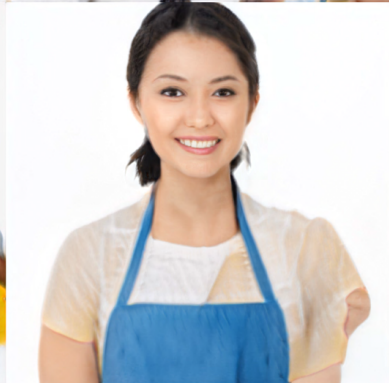

**White**

**Black**

**Asian**

Figure 11. Cleaner

**Male**

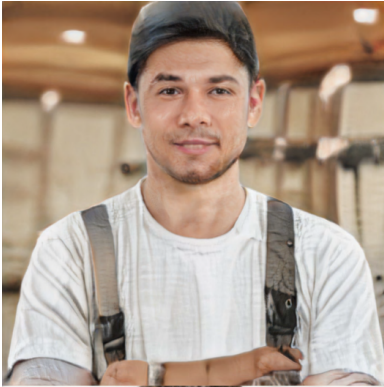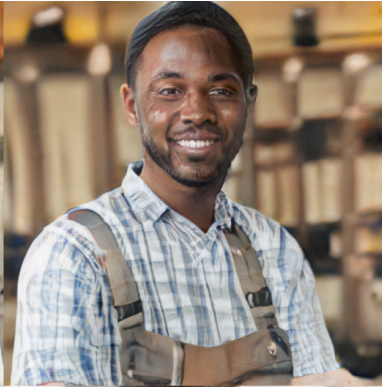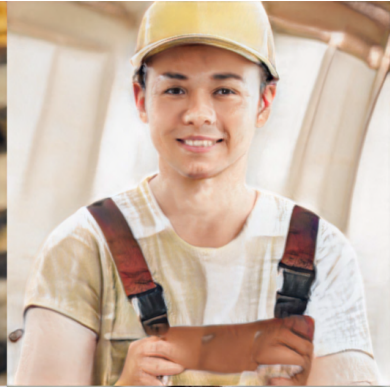

**Female**

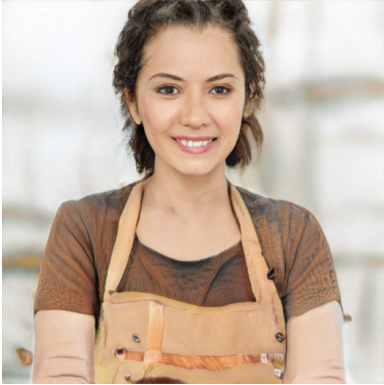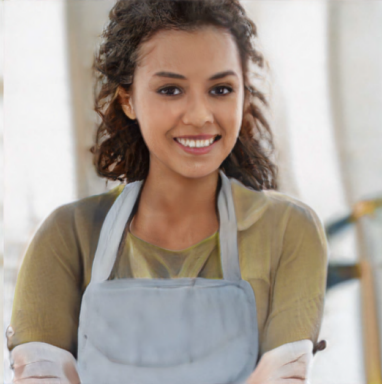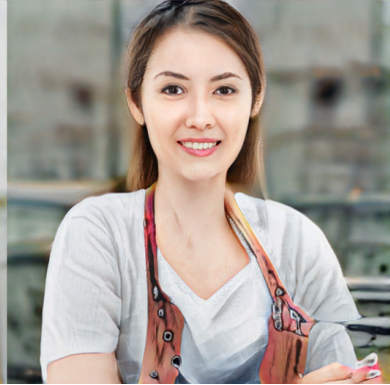

**White**

**Black**

**Asian**

Figure 12. Carpenter

**Male**

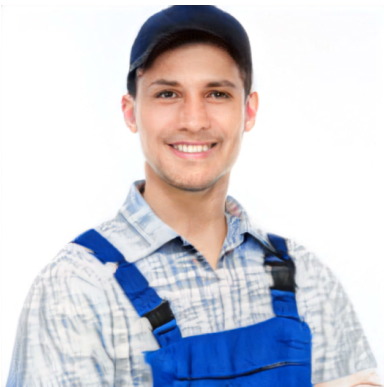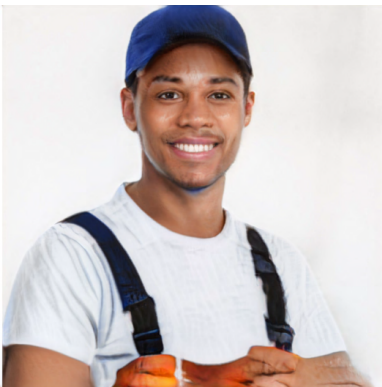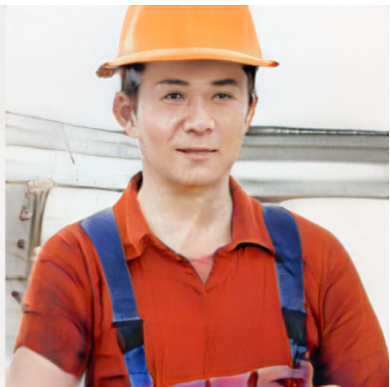

**Female**

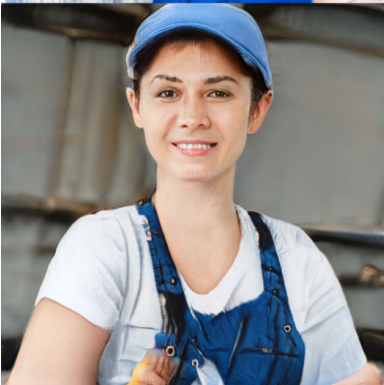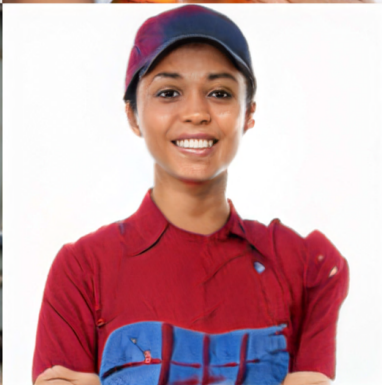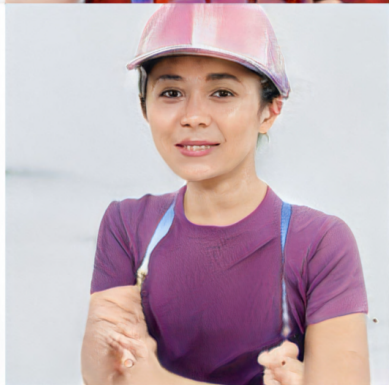

**White**

**Black**

**Asian**

Figure 13. Plumber

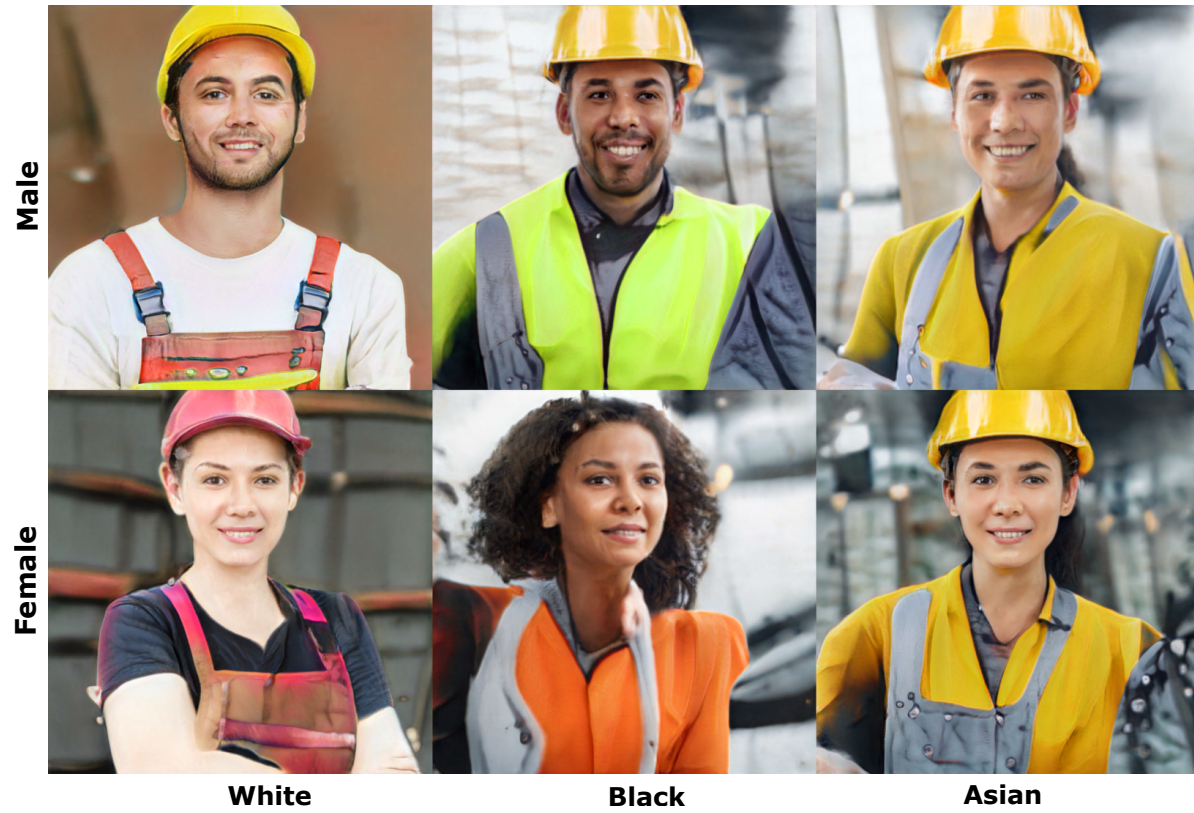

Figure 14. Machine Operator

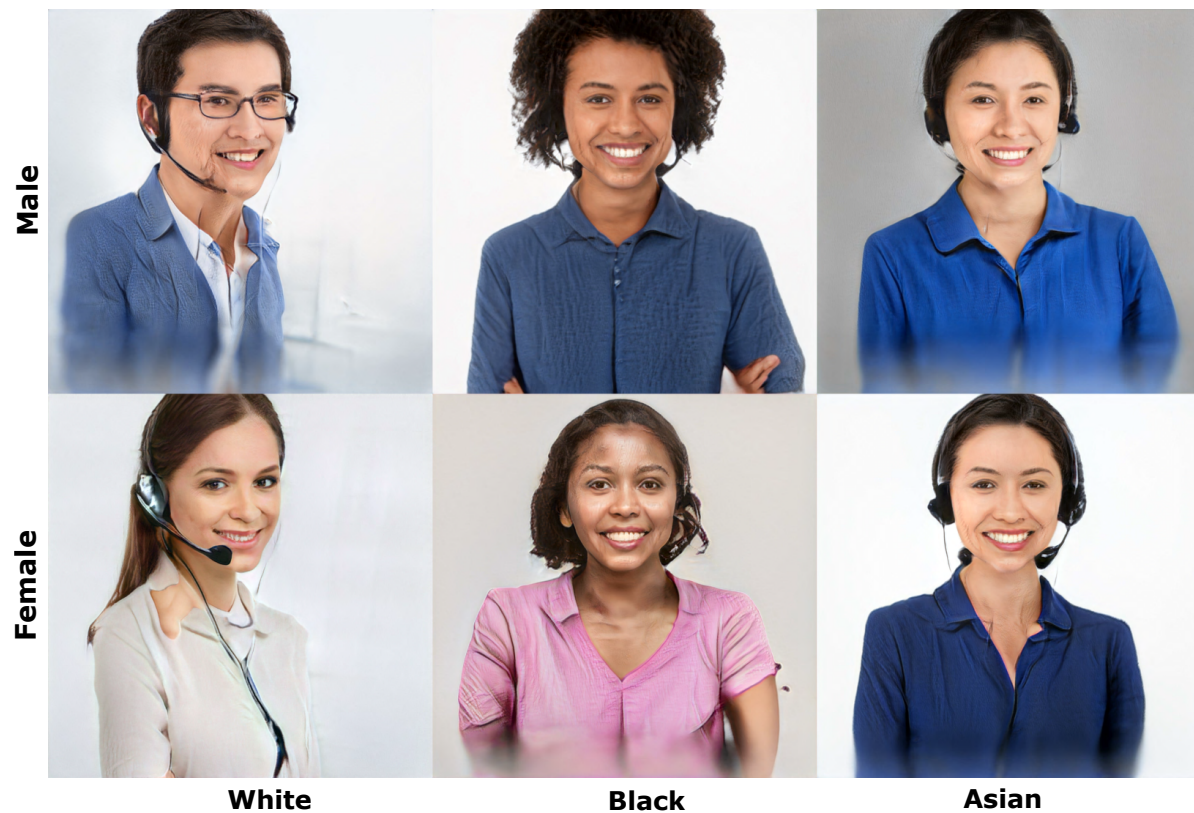

Figure 15. Technical Support Person

**Male**

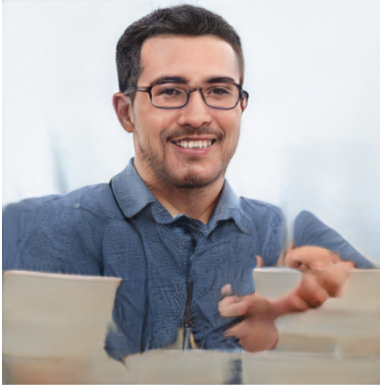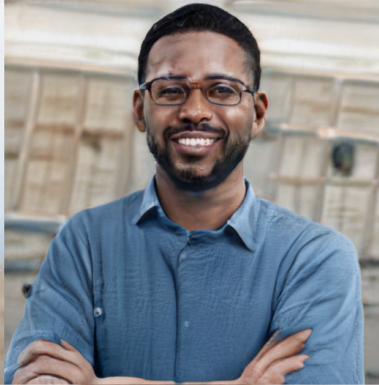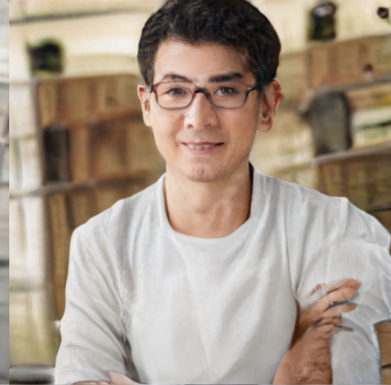

**Female**

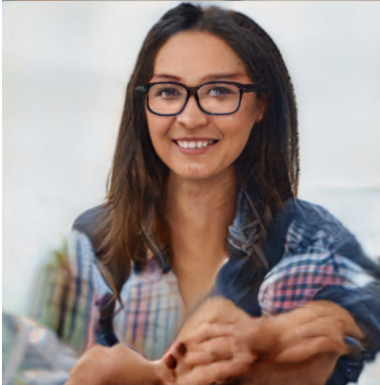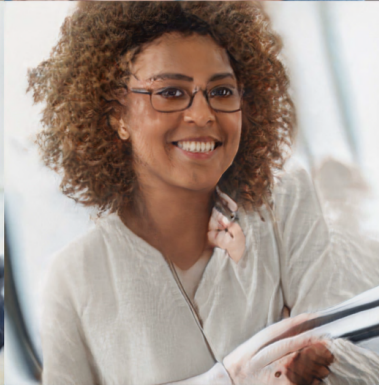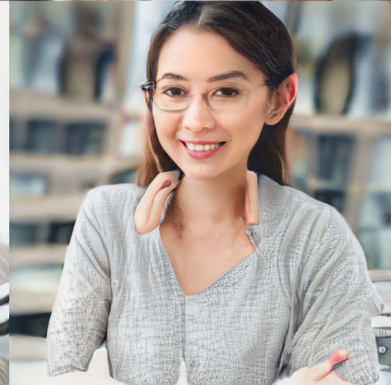

**White**

**Black**

**Asian**

Figure 16. Software Engineer

**Male**

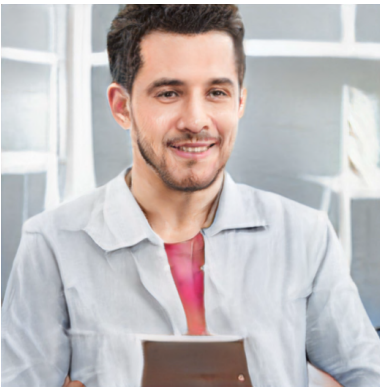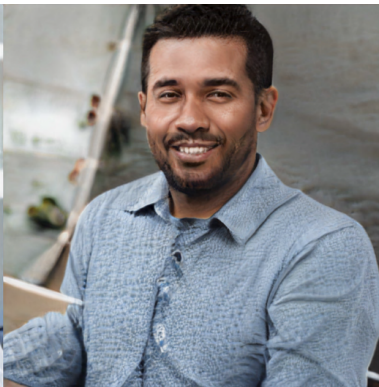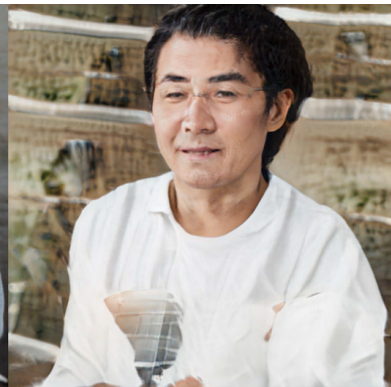

**Female**

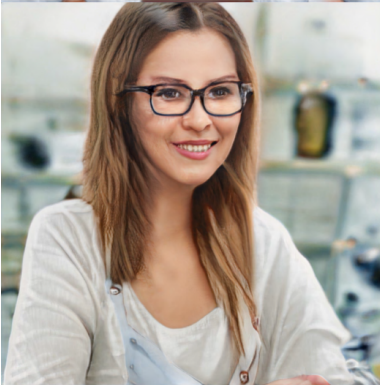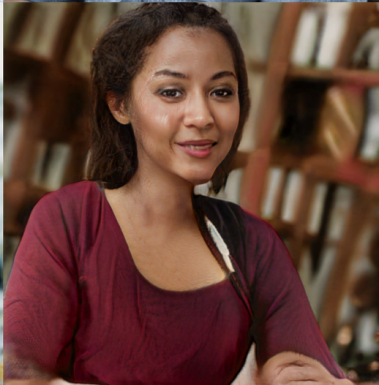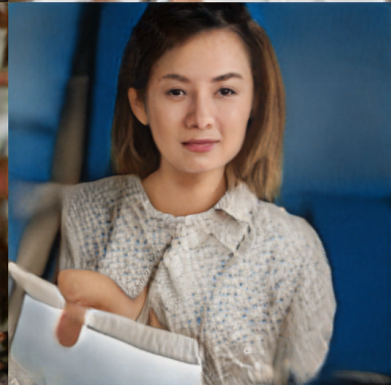

**White**

**Black**

**Asian**

Figure 17. Writer
